# Supplementary material for: Basophils from Cancer Patients Respond to Immune Stimuli and Predict Clinical Outcome
Source: PubMed Central journal article supplement (PMC7408103; doi:10.3390/cells9071631), 2020-07-07
Supplement: cells-09-01631-s001.pdf [file cells-09-01631-s001.pdf]

## Supplementary Material

**Table S1 – Antibodies used in immunohistochemistry (IHC) (The Protein Atlas online tool).**

| Marker   | Antibody  |
|----------|-----------|
| CD123    | CAB018374 |
| CCR3     | CAB003795 |
| FcεRI    | HPA036051 |
| CD63     | CAB026356 |
| CD203c   | HPA043772 |
| Tryptase | CAB016369 |

**Table S2 – Gene expression probes and datasets used in survival analyses (KM Plotter online tool).**

| Marker                        | Gene Probe ID |
|-------------------------------|---------------|
| CD123                         | 206148_at     |
| CCR3                          | 208304_at     |
| FcεRI                         | 211734_s_at   |
| CD63                          | 200663_at     |
| CD203c                        | 232737_S_at   |
| Tryptase                      | 210084_x_at   |
| Datasets included in analyses |               |
| GSE14764                      |               |
| GSE15622                      |               |
| GSE18520                      |               |
| GSE19829                      |               |
| GSE23554                      |               |
| GSE26193                      |               |
| GSE26712                      |               |
| GSE27651                      |               |
| GSE30161                      |               |
| GSE3149                       |               |
| GSE51373                      |               |
| GSE63885                      |               |
| GSE65986                      |               |
| GSE9891                       |               |
| TCGA                          |               |

**Table S3 – Ovarian cancer patient demographic and basophil characteristics.**

|                 | Characteristics and treatment history |                 |                                                          | Serum tryptase (ng/ml) | Total serum IgE (kU/L) | % Basophils | BAT Fold change in %CD63 |          |      |
|-----------------|---------------------------------------|-----------------|----------------------------------------------------------|------------------------|------------------------|-------------|--------------------------|----------|------|
|                 | Age                                   | Tumor Histology | Previous treatment                                       |                        |                        |             | anti-FcεRI               | anti-IgE | fMLP |
| 1               | 66                                    | HG serous       | Surgery and chemotherapy                                 | 4                      | 34.8                   | 0.45        | 9.9                      | 5.6      | 7.1  |
| 2               | 52                                    | HG serous       | Surgery, chemotherapy and bevacizumab                    | 6                      | 61.3                   | 0.62        | 18.7                     | 11.6     | 15.6 |
| 3               | 82                                    | Serous          | Surgery and chemotherapy                                 | 6                      | 6.2                    | 0.52        | 50.1                     | 51.2     | 7.4  |
| 4               | 66                                    | HG serous       | Surgery, chemotherapy and bevacizumab                    | 9                      | 8.7                    | 0.39        | 59.0                     | 55.0     | 5.5  |
| 5 <sup>a</sup>  | 67                                    | HG serous       | Surgery, chemotherapy and prolonged oral corticosteroids | 3                      | 2.9                    | 0.01        | -                        | -        | -    |
| 6 <sup>b</sup>  | 58                                    | HG serous       | Surgery and chemotherapy                                 | 12                     | 19.2                   | 1.02        | 16.4                     | 10.2     | 1.8  |
| 7               | 60                                    | HG serous       | Surgery and chemotherapy                                 | 6                      | 308                    | 0.30        | 8.0                      | 5.5      | 5.7  |
| 8 <sup>c</sup>  | 56                                    | HG serous       | Surgery and chemotherapy                                 | 5                      | 37.3                   | 0.54        | 1.5                      | 0.6      | 2.1  |
| 9               | 70                                    | HG serous       | No treatment                                             | 7                      | 39.2                   | 0.36        | 33.2                     | 60.8     | 35.7 |
| 10              | 48                                    | HG serous       | Surgery, no chemotherapy                                 | 4                      | 69.1                   | 0.73        | 49.7                     | 36.3     | 15.9 |
| 11              | 74                                    | HG serous       | Surgery and chemotherapy                                 | 7                      | 15.9                   | 0.50        | 10.9                     | 12.4     | 11.5 |
| 12              | 65                                    | HG endometrioid | Surgery and chemotherapy                                 | 7                      | 30.7                   | 0.25        | 39.3                     | 26.8     | 15.7 |
| 13 <sup>b</sup> | 55                                    | HG serous       | Surgery and chemotherapy                                 | 4                      | 24.6                   | 0.14        | 31.3                     | 16.0     | 2.5  |
| 14 <sup>c</sup> | 80                                    | HG serous       | Surgery and chemotherapy                                 | 4                      | 120                    | 0.17        | 1.6                      | 1.3      | 2.4  |
| 15              | 55                                    | HG clear cell   | Surgery, chemotherapy and bevacizumab                    | 2                      | 518                    | 0.30        | 11.0                     | 5.3      | 7.9  |
| 16 <sup>c</sup> | 68                                    | Mixed histology | Surgery and chemotherapy                                 | 5                      | 381                    | 0.02        | 0.6                      | 1.0      | 2.3  |
| 17              | 47                                    | HG serous       | Surgery, no chemotherapy                                 | 4                      | 47.7                   | 0.64        | 45.6                     | 50.8     | 16.7 |
| 18              | 66                                    | HG serous       | Surgery, no chemotherapy                                 | 8                      | 9.3                    | 0.48        | 64.0                     | 58.2     | 26.7 |
| 19 <sup>d</sup> | 72                                    | HG serous       | Surgery and chemotherapy                                 | <1                     | 220                    | 0.32        | 0.8                      | 0.8      | 8.0  |
| 20              | 67                                    | HG serous       | Surgery and chemotherapy                                 | 7                      | 94.3                   | 0.61        | 5.3                      | 3.8      | 21.1 |
| 21              | 53                                    | HG serous       | Surgery, no chemotherapy                                 | 6                      | 18.0                   | 0.60        | 41.1                     | 29.3     | 27.2 |
| 22              | 60                                    | LG serous       | Surgery, no chemotherapy                                 | 3                      | 51.5                   | 1.32        | 32.5                     | 15.0     | 9.1  |
| 23              | 74                                    | Mixed histology | Surgery and chemotherapy                                 | 5                      | 2.5                    | 0.25        | 63.6                     | 56.9     | 21.4 |
| 24              | 43                                    | HG serous       | No treatment                                             | 4                      | 3.2                    | 0.45        | 73.4                     | 58.2     | 24.9 |
| 25              | 71                                    | HG serous       | No treatment                                             | 7                      | <2.0                   | 0.38        | 27.0                     | 42.3     | 18.4 |
| 26              | 79                                    | HG serous       | No treatment                                             | 3                      | 11.8                   | 0.58        | 76.9                     | 71.3     | 20.9 |
| 27              | 47                                    | HG serous       | Surgery, no chemotherapy                                 | 4                      | 75.4                   | 0.63        | 31.0                     | 23.3     | 24.0 |
| 28              | 48                                    | LG endometrioid | No treatment                                             | 7                      | 156                    | 0.80        | 30.9                     | 20.9     | 14.5 |
| 29              | 79                                    | HG serous       | No treatment                                             | 7                      | 310                    | 0.76        | 74.9                     | 59.4     | 4.4  |
| 30              | 53                                    | HG serous       | Surgery and chemotherapy                                 | -                      | -                      | 0.40        | 76.2                     | 42.5     | 9.8  |
| 31              | 61                                    | HG serous       | No treatment                                             | 14                     | 91                     | 1.01        | 10.7                     | 11.3     | 5.5  |
| 32              | 62                                    | HG serous       | No treatment                                             | 6                      | 9.6                    | 0.22        | 14.2                     | 3.7      | 8.8  |
| 33              | 54                                    | HG serous       | No treatment                                             | -                      | 20.9                   | 0.79        | 46.1                     | 14.8     | 10.9 |
| 34              | 71                                    | Carcinosarcoma  | Surgery, no chemotherapy                                 | 4                      | -                      | 1.64        | 5.1                      | 11.9     | 6.6  |
| 35              | 25                                    | Mucinous        | Surgery, no chemotherapy                                 | 6                      | -                      | 1.16        | 6.5                      | 4.3      | 4.3  |
| 36              | 62                                    | HG serous       | Surgery, chemotherapy and bevacizumab                    | 6                      | -                      | 1.58        | 9.4                      | 4.1      | 25.9 |
| 37 <sup>b</sup> | 63                                    | HG serous       | Surgery, chemotherapy and bevacizumab                    | 4                      | -                      | 0.60        | 18.8                     | 7.7      | 2.7  |
| 38              | 67                                    | HG serous       | Surgery and chemotherapy                                 | 3                      | 46.6                   | 0.36        | 33.5                     | 22.3     | 29.5 |
| 39              | 71                                    | HG serous       | Surgery and chemotherapy                                 | 5                      | -                      | 0.09        | 78.6                     | 45.8     | 25.0 |
| 40              | 76                                    | HG serous       | Surgery, chemotherapy and bevacizumab                    | 7                      | -                      | 0.60        | 73.6                     | 72.6     | 10.8 |
| 41              | 47                                    | HG endometrioid | Surgery and chemotherapy                                 | 6                      | -                      | 0.65        | 76.5                     | 54.1     | 40.2 |
| 42 <sup>c</sup> | 61                                    | HG serous       | Surgery, chemotherapy and bevacizumab                    | 33                     | 466                    | 0.76        | 87.4                     | 82.3     | 56.6 |
| 43 <sup>d</sup> | 58                                    | HG serous       | Surgery, chemotherapy, bevacizumab and olaparib          | -                      | 115                    | 0.53        | 1.9                      | 1.2      | 11.9 |
| 44              | 59                                    | HG serous       | Surgery, chemotherapy and avelumab                       | -                      | -                      | 0.56        | 78.6                     | 75.4     | 9.5  |
| 45              | 68                                    | Serous          | Surgery and chemotherapy                                 | -                      | 40.9                   | 0.52        | 70.9                     | 13.8     | 43.4 |
| 46              | 52                                    | HG serous       | Surgery, chemotherapy and bevacizumab                    | -                      | -                      | 0.74        | 86.9                     | 84.8     | 5.2  |
| 47              | 56                                    | Clear cell      | Surgery and chemotherapy                                 | -                      | -                      | 1.20        | 93.3                     | 87.2     | 29.3 |
| 48              | 56                                    | HG serous       | Surgery, chemotherapy and avelumab                       | -                      | -                      | 0.42        | 97.5                     | 85.1     | 12.5 |
| 49              | 62                                    | HG serous       | Surgery, chemotherapy and bevacizumab                    | -                      | -                      | 0.60        | 93.7                     | 75.2     | 48.8 |
| 50              | 61                                    | HG serous       | Surgery and chemotherapy                                 | -                      | -                      | 2.30        | 84.7                     | 90.4     | 52.2 |
| 51              | 66                                    | HG serous       | Surgery, chemotherapy and bevacizumab                    | -                      | -                      | 0.83        | 41.2                     | 24.8     | 10.6 |
| 52              | 72                                    | HG serous       | Surgery and chemotherapy                                 | -                      | -                      | 0.63        | 85.9                     | 57.9     | 33.5 |
| 53              | 56                                    | HG serous       | Surgery and chemotherapy and niraparib                   | -                      | 7.8                    | 0.76        | 41.1                     | 5.4      | 7.9  |

<sup>a</sup>Patient who had received a recent prolonged course of high-dose oral corticosteroids and had an extremely low basophil count meaning BAT was not possible,

<sup>b</sup>Patients that responded to only IgE-mediated activation,

<sup>c</sup>'Non-responder' patients,

<sup>d</sup>Patients that responded only to non-IgE-mediated activation,

<sup>e</sup>Patient with elevated serum tryptase (ULN = 14 ng/ml) and total serum IgE (ULN = 81 kU/L).

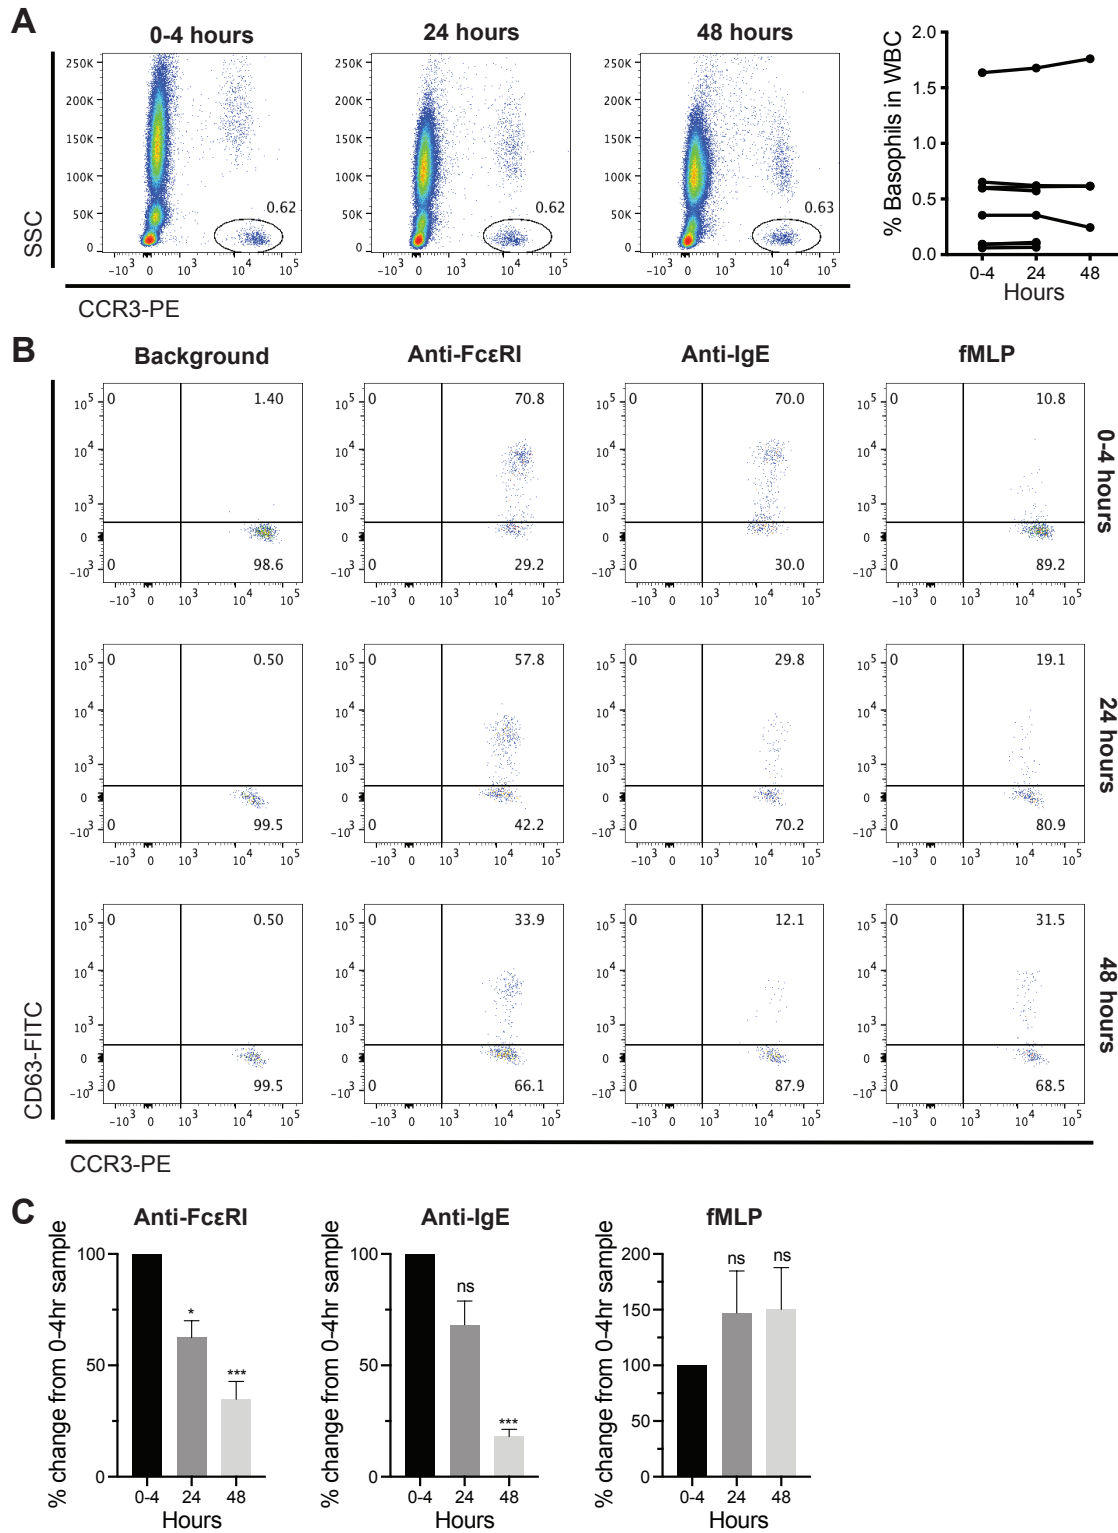

**Figure S1 – Basophil activation following blood collection.** Circulating CCR3<sup>high</sup>SSC<sup>low</sup> basophils identified by flow cytometry up to 4, 24 and 48 hours after blood collection (A) showed lower IgE-mediated activation compared to freshly-evaluated samples (B, C). Non-IgE-mediated activation was retained in samples stimulated 4, 24, and 48 hours after collection (B, C).

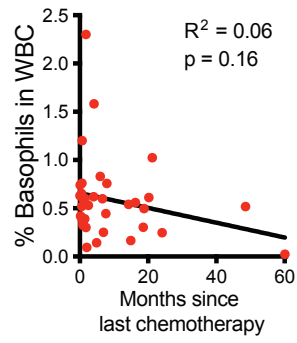

**Figure S2 –Basophils in whole blood and time lapse since last chemotherapy treatment.** No correlation was measured between the proportion of basophils in whole blood samples from ovarian cancer patients, and the time since they were last treated with chemotherapy.

### Serum tryptase

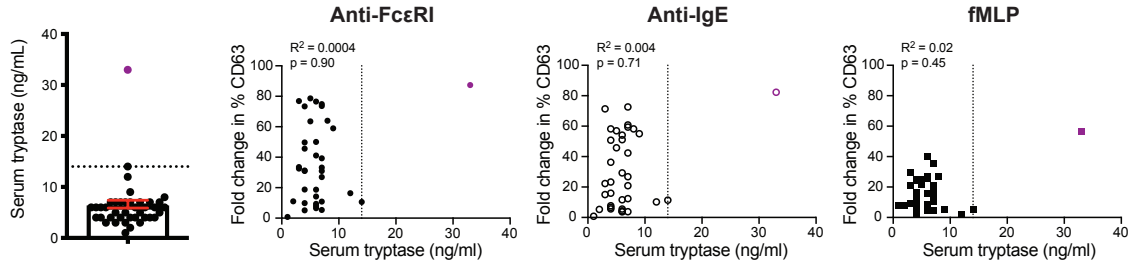

### Total serum IgE

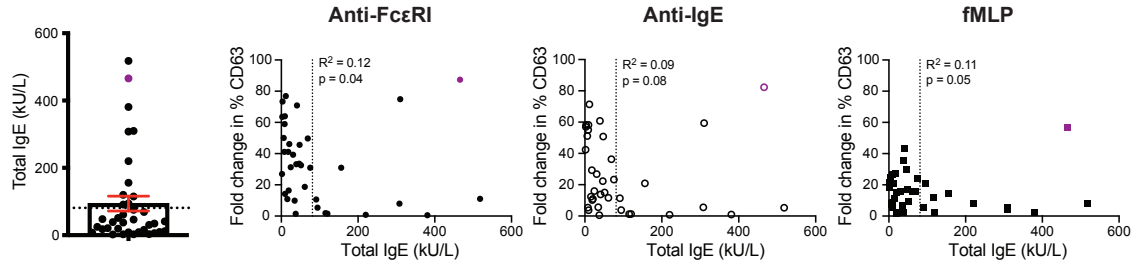

**Figure S3 – Serum tryptase and total IgE.** No correlation was measured between the level of *ex vivo* basophil activation and i. serum tryptase levels (in the normal reference range: 2-14 ng/ml), or ii. total IgE levels (reference range: 0-81 kU/L). Activation of basophils in blood from an ovarian cancer patient with elevated serum tryptase (33 ng/ml) and total IgE (466 kU/L) was high (purple symbols).

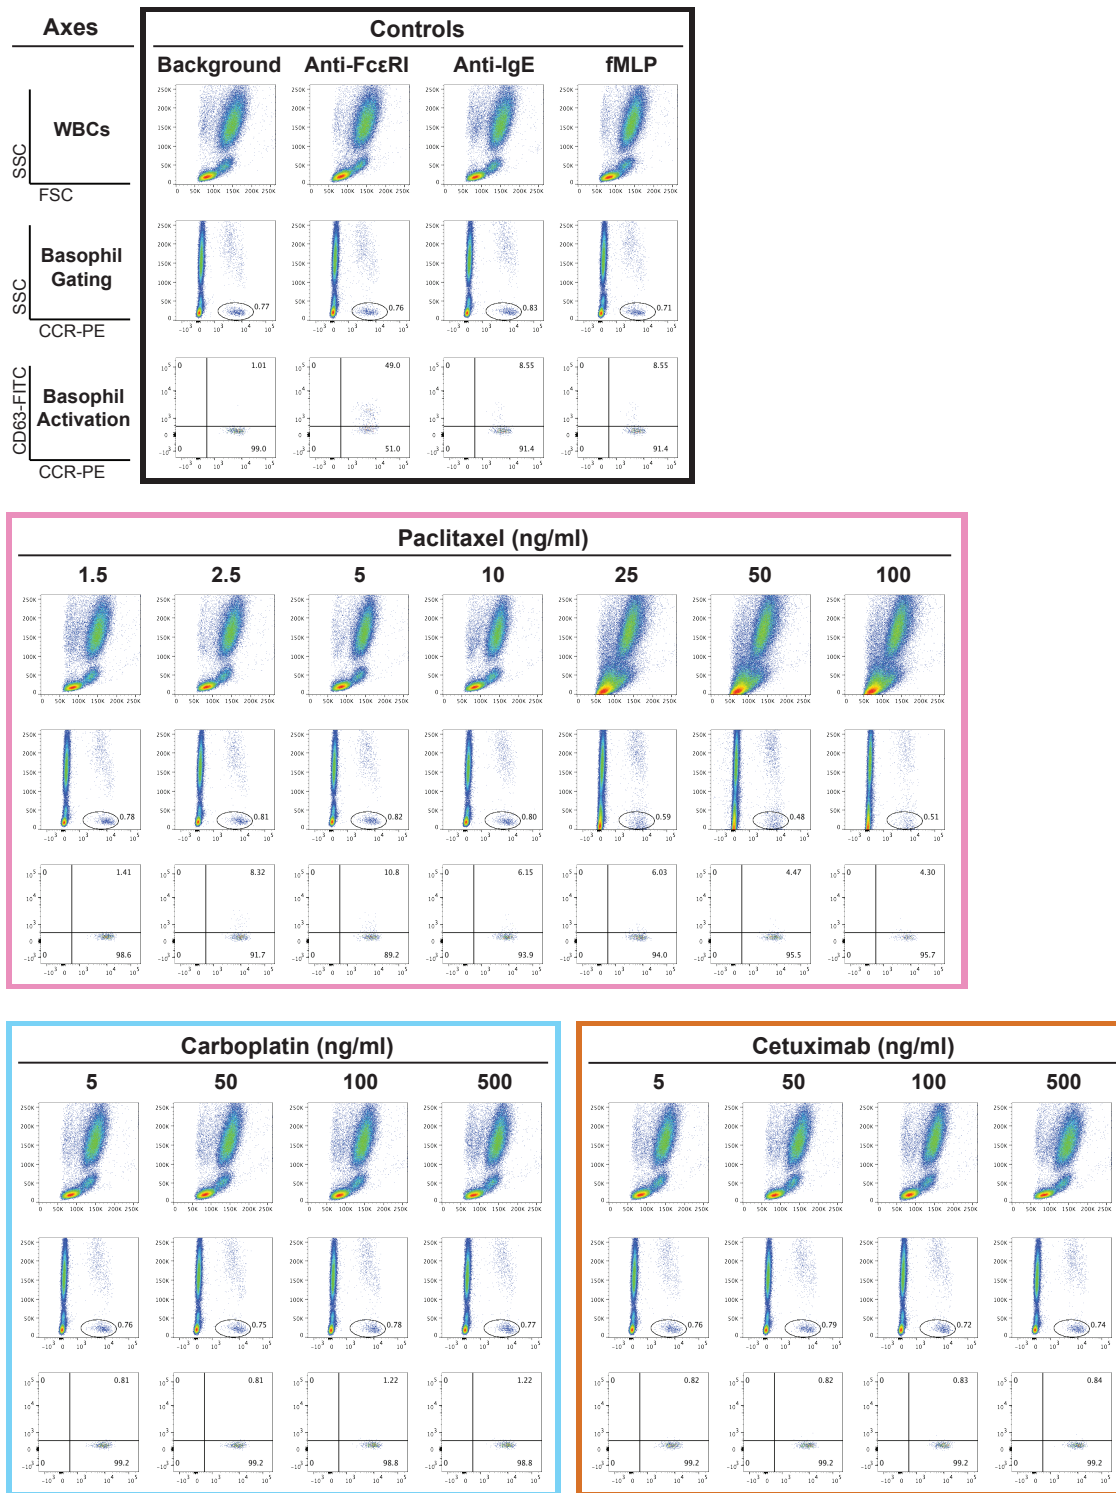

**Figure S4 – Hypersensitivity to chemotherapy confirmed by *ex vivo* basophil stimulation.** Flow cytometric dot plots of a blood sample from an ovarian cancer patient who had a prior systemic reaction following IV infusion of paclitaxel. Basophils were activated by *ex vivo* stimulation with anti-FcεRI, anti-IgE, fMLP, and paclitaxel (2.5–25 μg/ml). Following stimulation with concentrations of ≥25 ng/ml paclitaxel, marked changes to the WBC population were observed, clear identification of CCR3<sup>high</sup>SSC<sup>low</sup> basophils was not possible, and measurement of cell-surface CD63 up-regulation was ablated, together suggesting a high basophil response. In contrast, circulating basophils from this patient were not activated by carboplatin (to which the patient is clinically tolerant), or cetuximab (an antibody with known hypersensitivity response in a subset of patients with cancer).

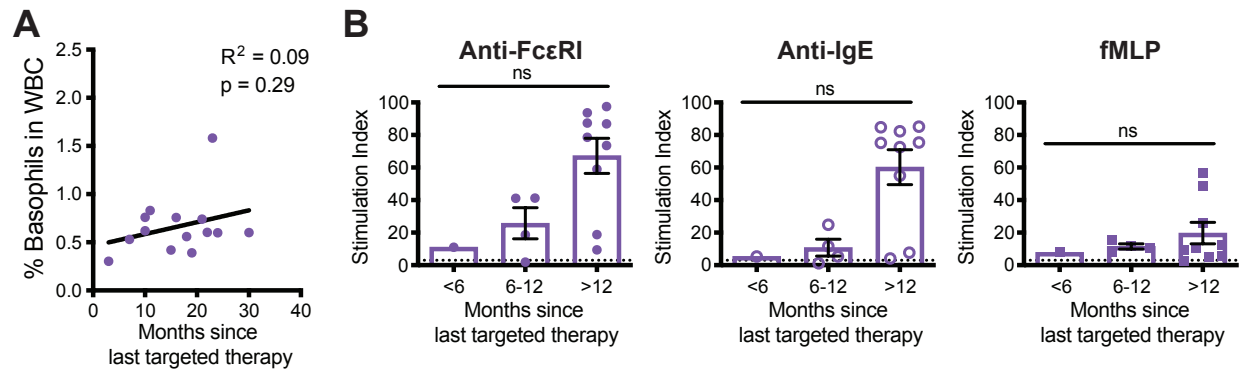

**Figure S5 – Circulating basophils and time lapse since last targeted therapy treatment.** No correlation was measured between the proportion of basophils in whole blood samples from ovarian cancer patients, and the time since they were last treated with targeted therapies (anti-VEGF mAb bevacizumab, PARP inhibitors olaparib and niraparib, or the anti-PD-L1 mAb avelumab) (A). Similarly, the degree of basophil activation following *ex vivo* immune stimulation was independent of the time between the last treatment and BAT analysis (B).

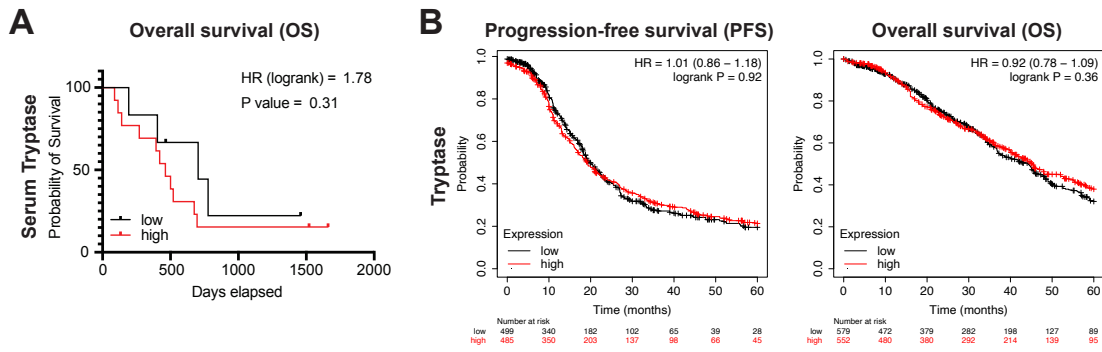

**Figure S6 – Tryptase and patient outcomes.** There is no association between ovarian patient survival outcomes and serum tryptase levels (A) or expression of tryptase in the tumor (B).
